# Supplementary material for: Quantitative determination of activation energies in mechanochemical reactions
Source: Royal Society of Chemistry journal article supplement (doi:10.1039/c6cp04280e), 2016-01-01
Supplement: c6cp04280e1.pdf [file c6cp04280e1.pdf]

**Supporting Information**

**Quantitative Determination of Activation Energies in Mechanochemical Reactions**

Franziska Fischer<sup>a</sup>, Klaus-Jürgen Wenzel<sup>a</sup>, Klaus Rademann<sup>a,b</sup>, Franziska Emmerling<sup>a</sup>

a. BAM Federal Institute for Materials Research and Testing, R.-Willstätter-Str. 11, 12489 Berlin,

b. Department of Chemistry, Humboldt-Universität zu Berlin, B.-Taylor-Str. 2, 12489 Berlin

KEYWORDS mechanochemistry, activation energy, in situ investigations, cocrystal

**Table of contents**

|                                                                        |    |
|------------------------------------------------------------------------|----|
| A Materials and methods                                                | S2 |
| B X-ray powder diffraction patterns and crystal structure of compounds | S3 |
| C Raman data of compounds                                              | S6 |
| D Temperature-dependent measurements                                   | S8 |
| E Arrhenius equations and plots                                        | S9 |

## A Materials and Methods

**Experimental detail.** Ibuprofen (ibu),  $C_{13}H_{18}O_2$ , (99%, Alfa Aesar, Germany) and nicotinamide (na),  $C_6H_6N_2O$ , ( $\geq 99.5\%$ , Sigma Aldrich, Germany) were purchased commercially and were used without further purification. Grinding was performed for all reactions (LAG and neat grinding) at 50 Hz for 40 min in a conventional ball mill (Pulverisette 23, Fritsch, Germany). In a typical experiment, the coolable stainless-steel jar subpart of a 10 mL vessel was pre-tempered with two steel balls of 10 mm diameter and 4 g in mass. Afterwards, the pre-tempered reactants were added in a stoichiometric ratio of 1:1 into the vessel for a total load of 1 g (0.6281 g ibuprofen and 0.3719 g nicotinamide). The vessel was directly sealed with a Makrolon top part. The nitrogen stream was turned on 30 s before milling in order to reach the required temperature quickly after starting the milling process. The temperature of the jar was controlled in the range of  $\pm 1$  K by adjusting the nitrogen stream. The experiments were conducted at the following temperatures: 282 K, 286 K, 290 K, 294 K, 298 K, and 302 K. Each experiment was repeated six times.

**Raman Spectroscopy.** Raman measurements were performed using a Raman RXN1™ Analyser (Kaiser Optical Systems, France). The spectra were collected using a contactless probe head (working distance 6.0 cm, spot size 1.0 mm). Raman spectra were recorded with an acquisition time of 5 s and 5 accumulations (NIR excitation radiation at  $\lambda = 785$  nm and an irradiation of  $6.6$  W/cm<sup>2</sup>).

**Powder X-ray diffraction (PXRD).** The milling synthesis of the ibu:na cocrystal was verified by PXRD (Figure S1). All PXRD experiments were carried out using a D8 diffractometer (Bruker AXS, Karlsruhe, Germany) in transmission geometry (Cu- $K_{\alpha 1}$  radiation,  $\lambda = 1.54056$  Å).

## B X-ray powder diffraction patterns and crystal structure of compounds

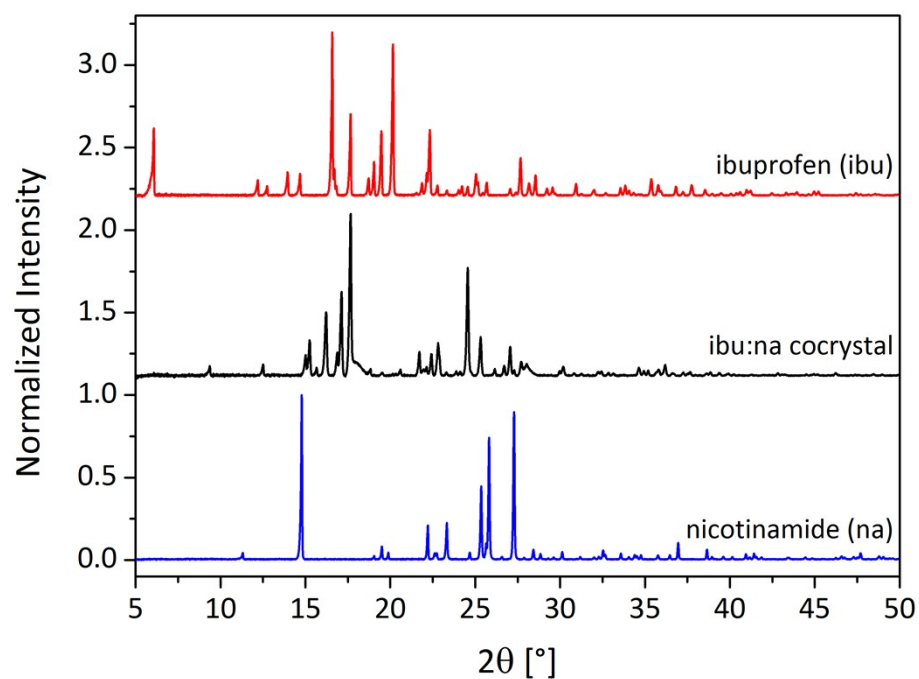

**Fig. S1** XRD patterns of the ibuprofen:nicotinamide cocrystal (black) and the respective reactants ibuprofen (red) and nicotinamide (blue).

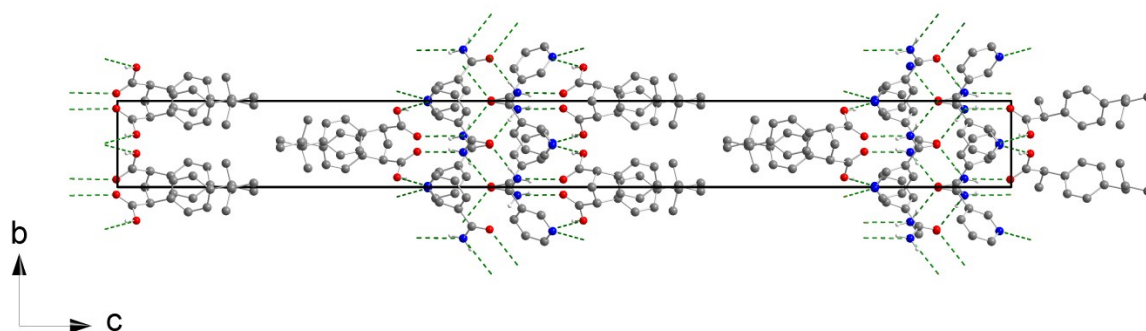

**Fig. S2** Crystal structure of the ibuprofen:nicotinamide cocrystal along the a-axis.

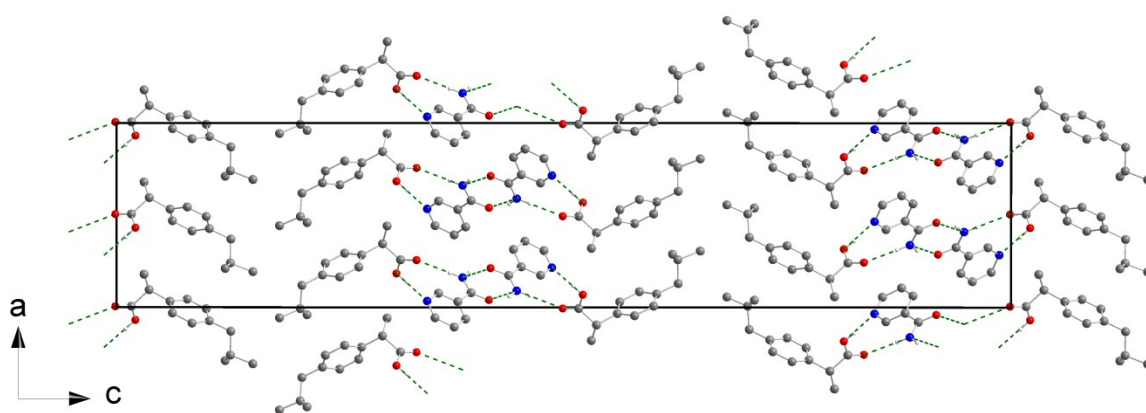

**Fig. S3** Crystal structure of the ibuprofen:nicotinamide cocrystal along the b-axis.

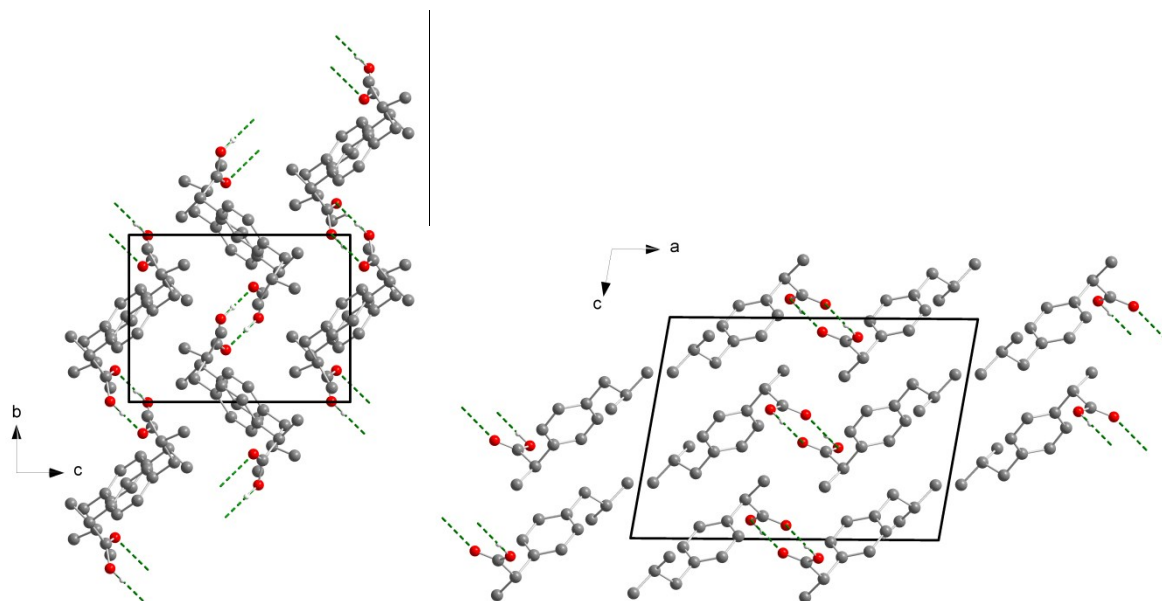

**Fig. S4** Crystal structure of the reactant ibu along the a- and the b-axis.

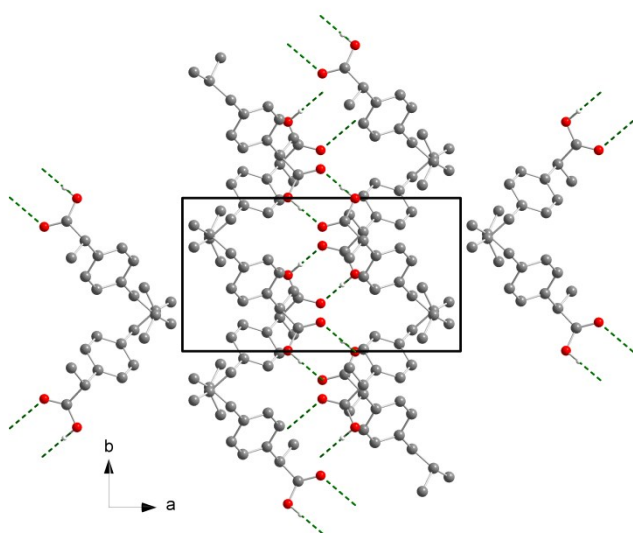

**Fig. S5** Crystal structure of the reactant ibu along the c-axis.

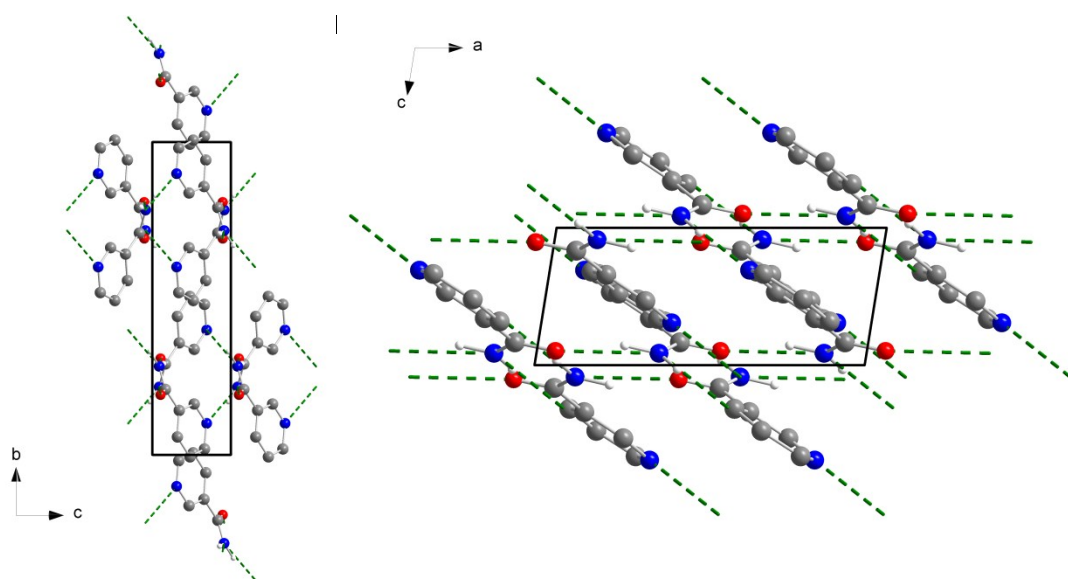

**Fig. S6** Crystal structure of the reactant na along the a- and the b-axis.

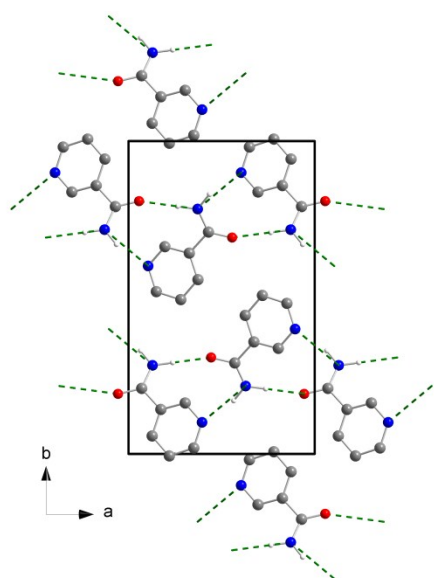

**Fig. S7** Crystal structure of the reactant na along the c-axis.

### C Raman data of compounds

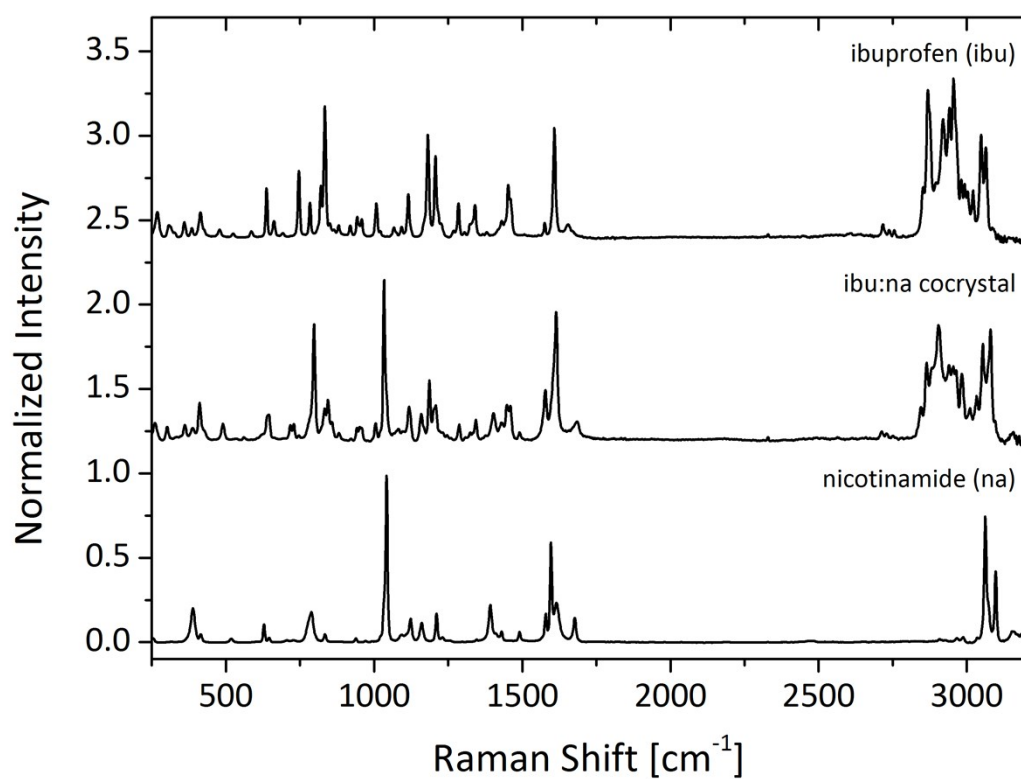

**Fig. S8** Raman spectra of the ibu:na cocrystal and the reactants ibu and na.

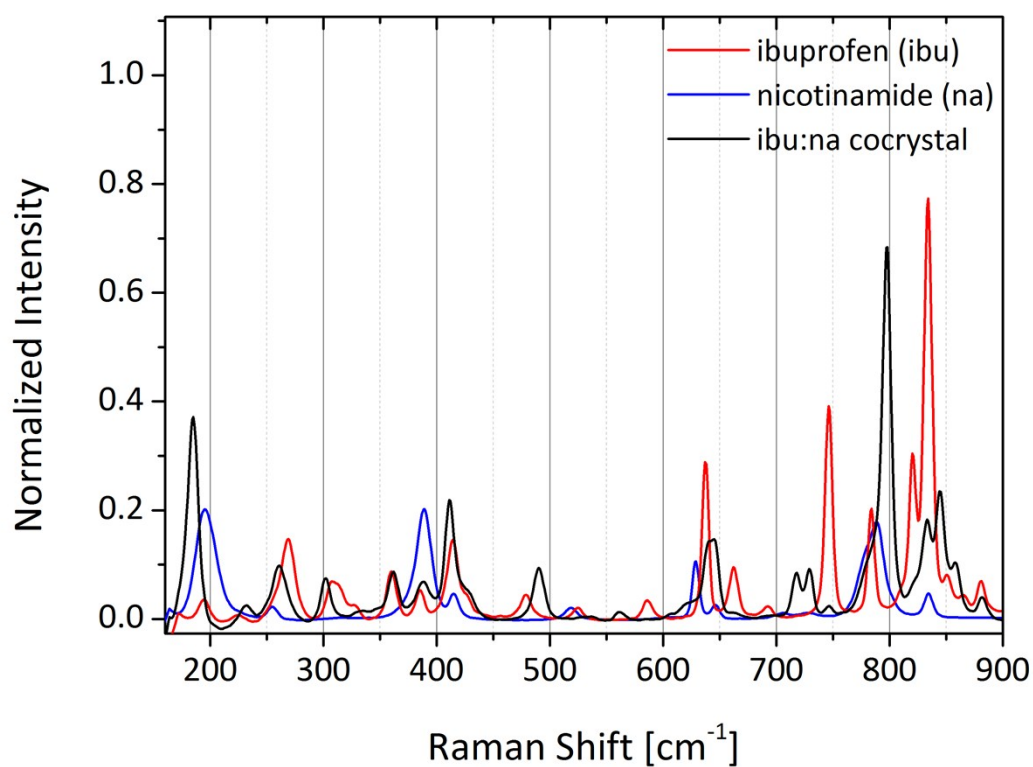

**Fig. S9** Zoomed Raman spectra of the ibu:na cocrystal and the reactants ibu and na.

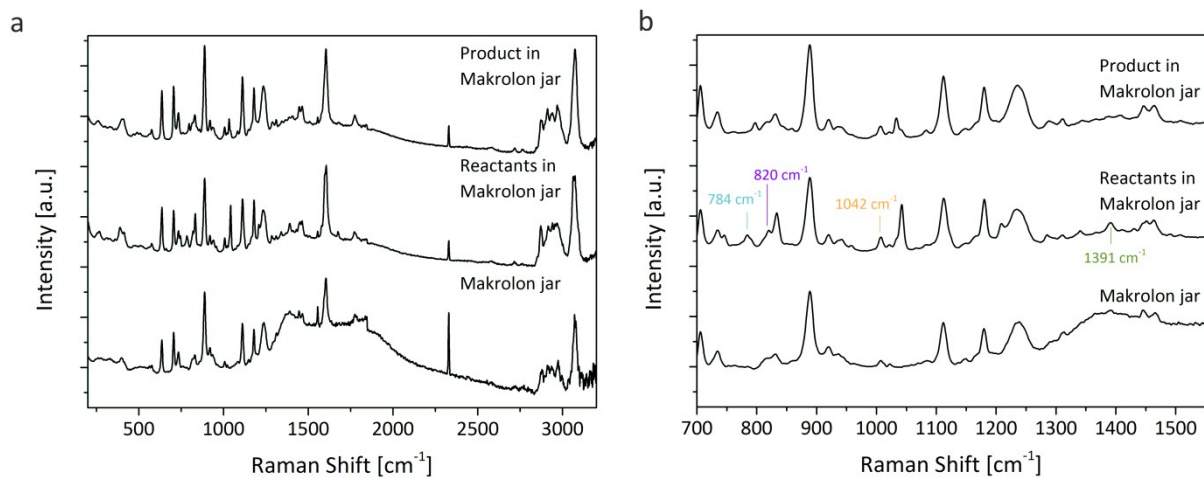

**Fig. S10** a) Raman spectra of the empty grinding jar, the ibu:na cocrystal and the reactants ibu and na with the grinding jar background. b) Zoomed Raman spectra.

## D Temperature-dependent data

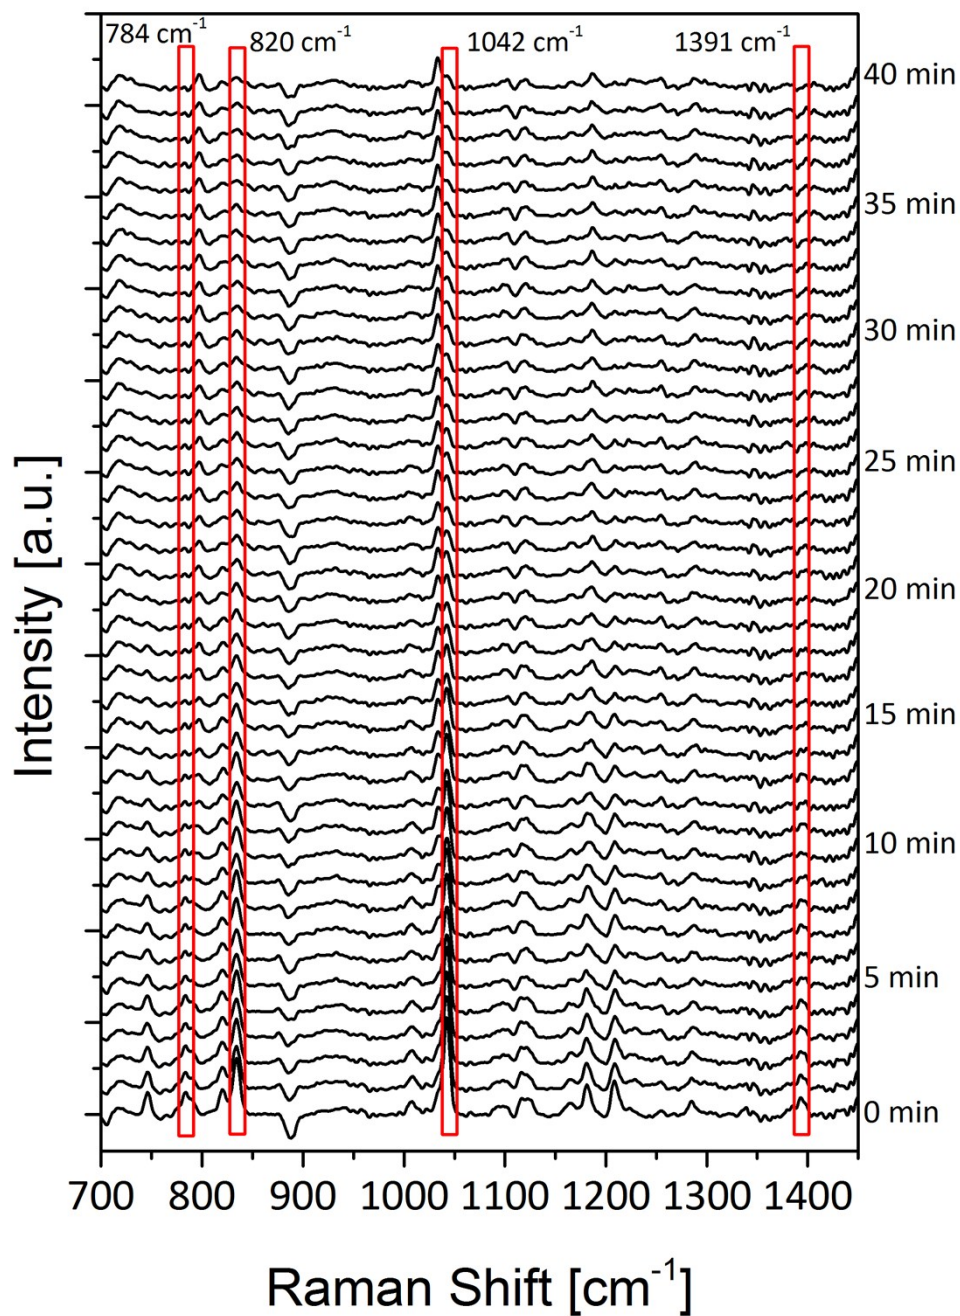

**Fig. S11** Time-dependent and background corrected Raman spectra of the *ibu:na* synthesis. Milling synthesis was performed at 50 Hz for 40 min at 286 K.



**Table S1 | Temperature-dependent rate constants obtained at different Raman signals.** sd. = standard deviation.

| T [K] | 784 cm <sup>-1</sup>   |       | 820 cm <sup>-1</sup>   |       | 1042 cm <sup>-1</sup>  |       | 1391 cm <sup>-1</sup>  |       |
|-------|------------------------|-------|------------------------|-------|------------------------|-------|------------------------|-------|
|       | k [min <sup>-1</sup> ] | sd.   |
| 282   | 0.073                  | 0.009 | 0.027                  | 0.005 | 0.037                  | 0.002 | 0.031                  | 0.001 |
| 286   | 0.086                  | 0.008 | 0.029                  | 0.002 | 0.038                  | 0.004 | 0.035                  | 0.003 |
| 290   | 0.103                  | 0.007 | 0.030                  | 0.002 | 0.042                  | 0.004 | 0.039                  | 0.005 |
| 294   | 0.106                  | 0.017 | 0.032                  | 0.004 | 0.044                  | 0.001 | 0.046                  | 0.003 |
| 298   | 0.113                  | 0.007 | 0.034                  | 0.009 | 0.049                  | 0.007 | 0.049                  | 0.014 |
| 302   | 0.129                  | 0.027 | 0.035                  | 0.008 | 0.057                  | 0.003 | -                      | -     |

### E Arrhenius equations

$$(S1) \quad k = A e^{-\frac{E_a}{RT}}$$

$$(S2) \quad \ln(k) = -\frac{E_a}{R} \left(\frac{1}{T}\right) + \ln(A)$$

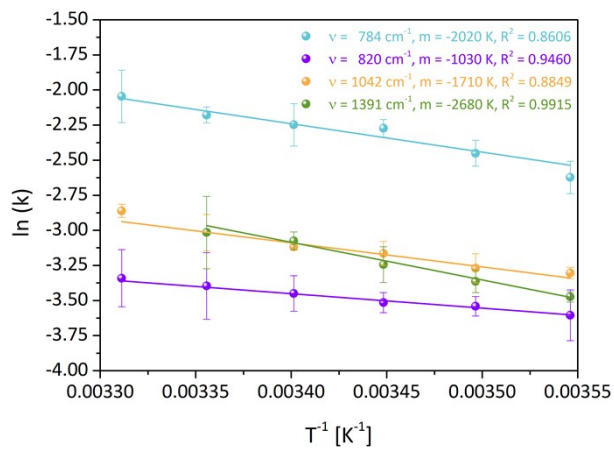

**Fig. S12** Arrhenius plots according to the temperature-dependent rate constants determined based on the Raman signal at 784 cm<sup>-1</sup>, 820 cm<sup>-1</sup>, 1042 cm<sup>-1</sup>, and 1391 cm<sup>-1</sup>.
